# Supplementary material for: Improved electrochemical performance of the Na3V2(PO4)3 cathode by B-doping of the carbon coating layer for sodium-ion batteries
Source: Royal Society of Chemistry journal article supplement (doi:10.1039/c5ta03519h), 2015-01-01
Supplement: c5ta03519h1.pdf [file c5ta03519h1.pdf]

**Supporting Information for**  
**“Improved electrochemical performance of  $\text{Na}_3\text{V}_2(\text{PO}_4)_3$  cathode by**  
**B-doping of carbon coating layer for sodium-ion batteries” by**

**Wei Shen, Hui Li, Cong Wang, Zhihong Li, Qunjie Xu, Haimei Liu\*, Yonggang Wang\***

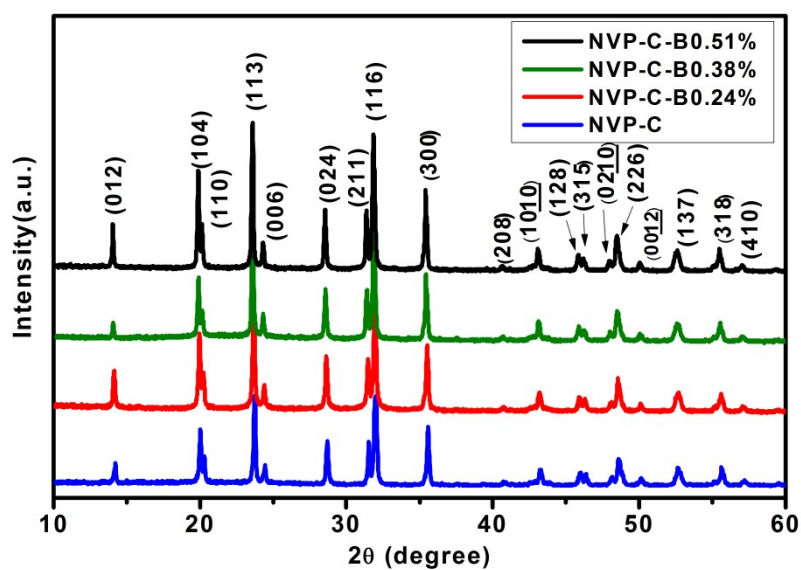

**Fig. S1** XRD patterns of NVP-C and various NVP-C-B samples.

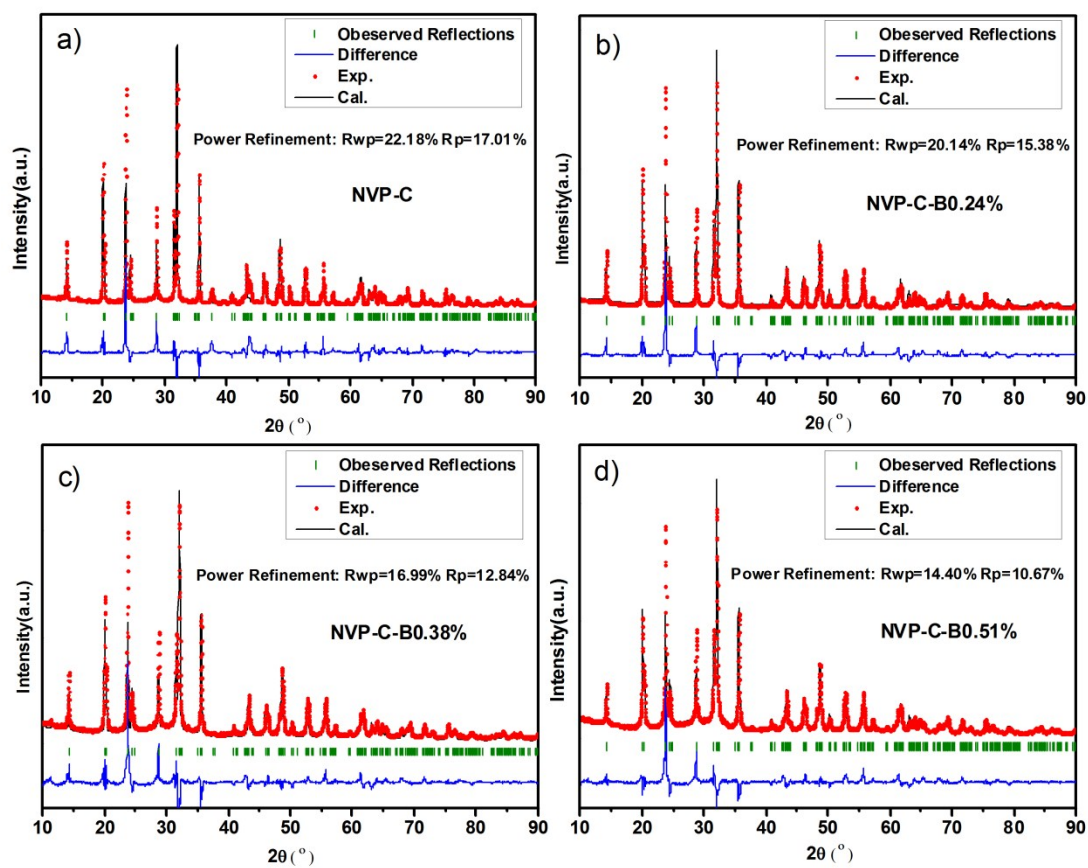

**Fig. S2** Rietveld refined XRD patterns of NVP-C and various NVP-C-B samples.

**Table S1.** Results of structural analysis obtained from XRD Rietveld refinement of NVP-C and various NVP-C-B samples.

| Lattice constant | NVP-C   | NVP-C-B0.24% | NVP-C-B0.38% | NVP-C-B0.51% |
|------------------|---------|--------------|--------------|--------------|
| a(=b) /Å         | 8.7257  | 8.7264       | 8.7212       | 8.7216       |
| c/Å              | 21.7826 | 21.7888      | 21.7610      | 21.7648      |
| v/Å <sup>3</sup> | 1435.92 | 1436.91      | 1433.58      | 1433.37      |

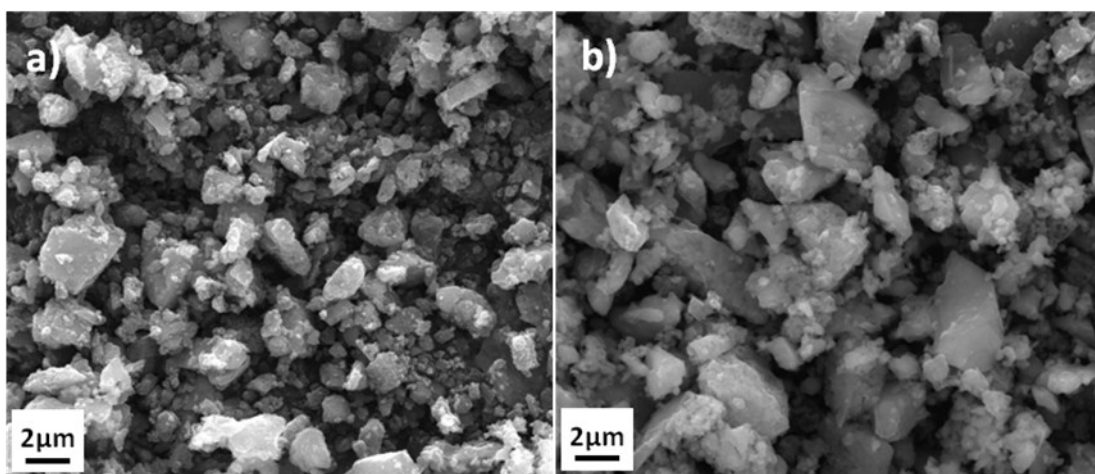

**Fig. S3** SEM images of a) NVP-C-B0.24% and b) NVP-C-B0.51% samples.

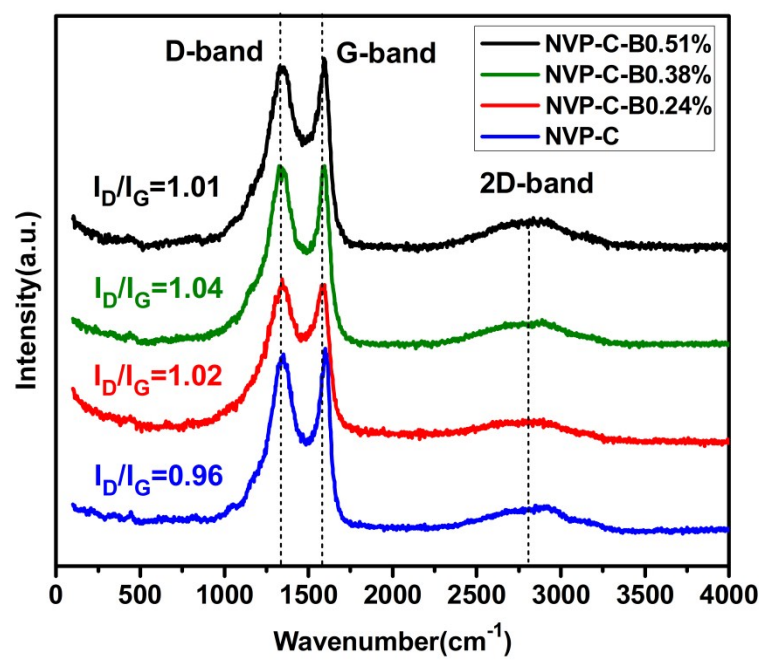

**Fig. S4** Raman spectra of NVP-C sample and various NVP-C-B samples.

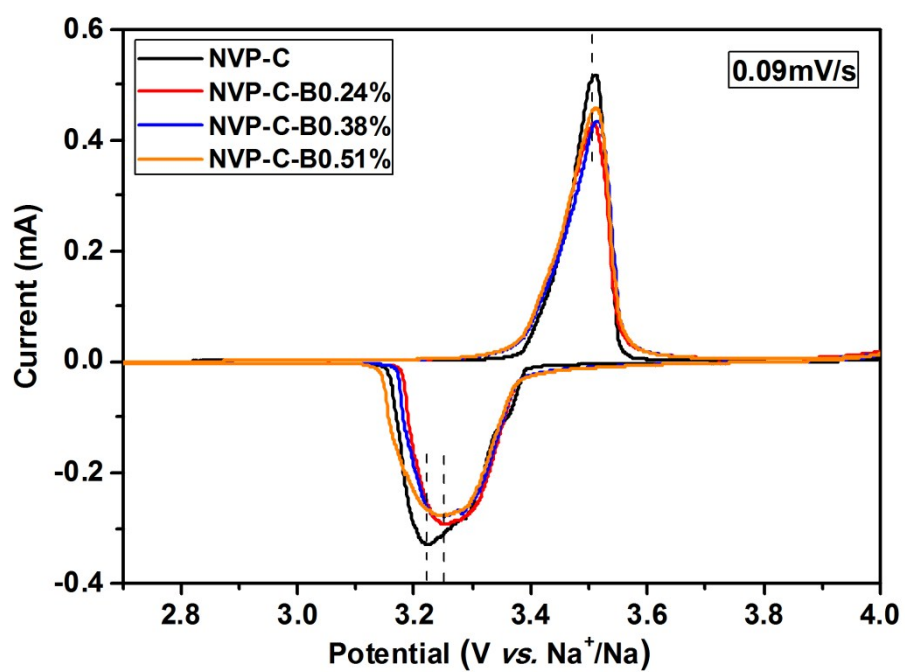

**Fig. S5** CV curves at 0.09mV/s for NVP-C and various NVP-C-B samples.

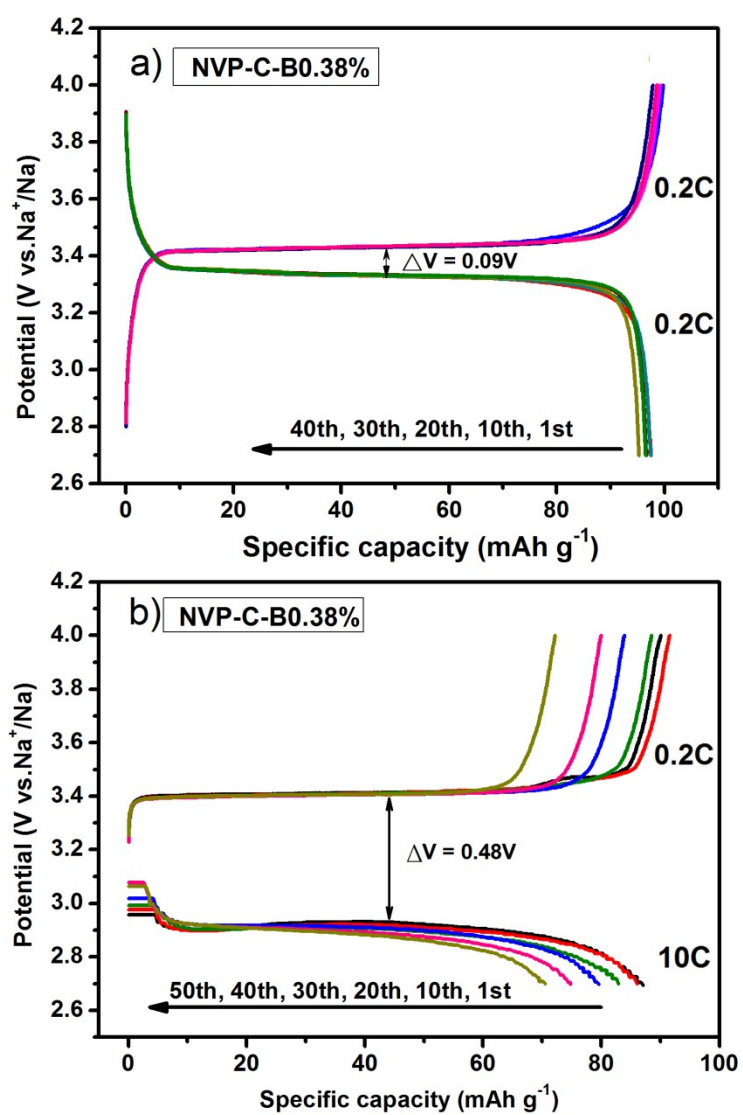

**Fig. S6** Charge/discharge profiles of various cycles at the current densities of a) 0.2 C and b) 10 C in the NVP-C-B0.38% sample.

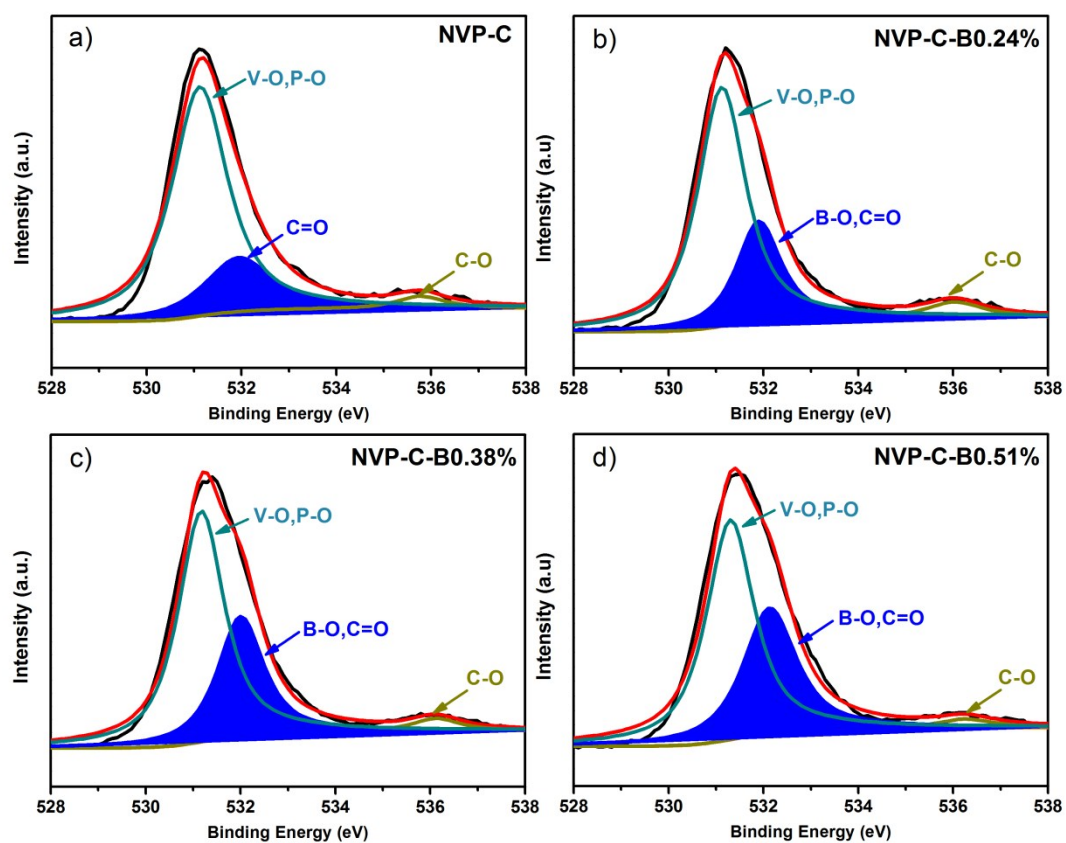

**Fig. S7** a-d) High-resolution XPS spectra of O1s for the NVP-C and various NVP-C-B samples.
